# Supplementary material for: Pliable electrode of porous graphene-encapsulated FeNiSe4 binary-metal selenide nanorods as a binder-free anode for lithium-ion batteries
Source: Royal Society of Chemistry journal article supplement (doi:10.1039/d3ma00911d), 2024-01-01
Supplement: d3ma00911d1.pdf [file d3ma00911d1.pdf]

## Supplementary Information

### Pliable Electrode of Porous Graphene-Encapsulated FeNiSe<sub>4</sub> Binary-Metal Selenide Nanorods as Binder-free Anode for Lithium-Ion Batteries

Mingming Hao, Caiyun Guo, Yuhui Wen, Liting Zhao, Xiaoting Zhang\* and Rui Wang\*

Beijing Key Laboratory of Clothing Materials R & D and Assessment, Beijing Engineering Research Center of Textile Nanofiber, School of Materials Design & Engineering, Beijing Institute of Fashion Technology, Beijing 100029, China.

\* Corresponding author. E-mail: zhangxt@bift.edu.cn, clywangrui@bift.edu.cn

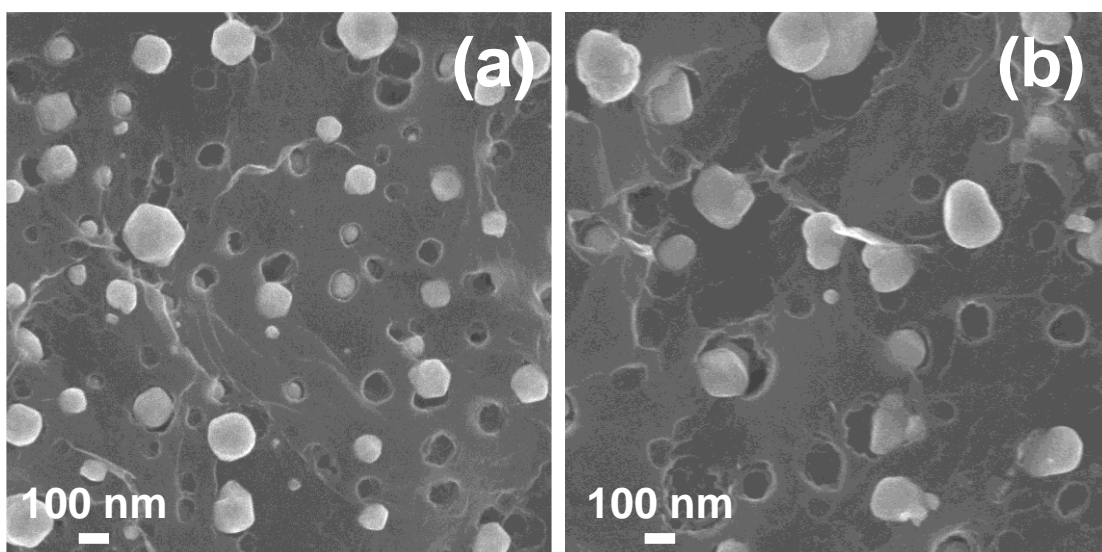

**Fig. S1** SEM images of (a) Ni/PG and (b) NiSe<sub>2</sub>/PG.

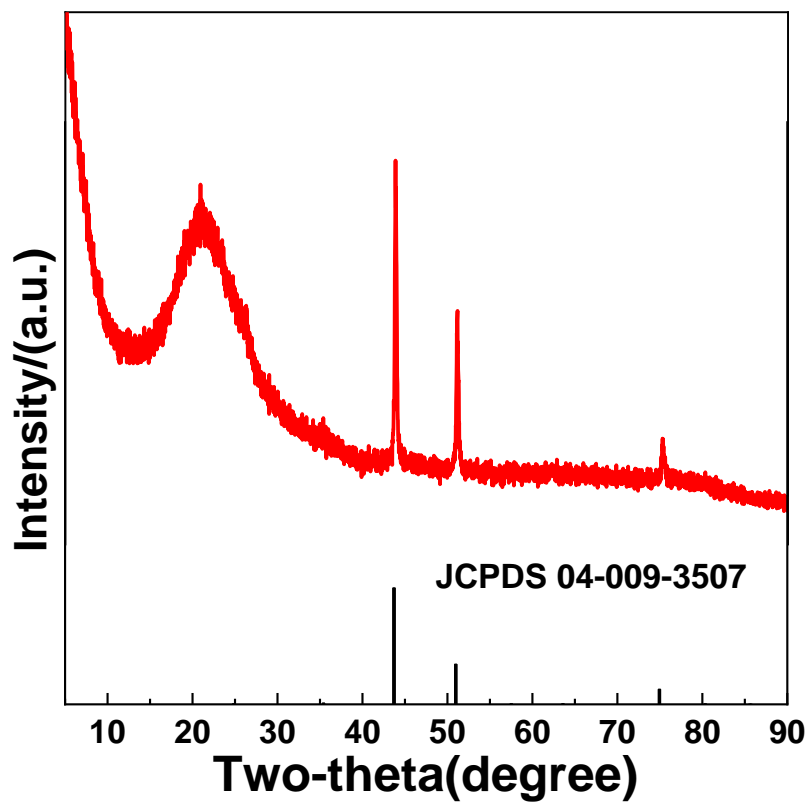

Fig. S2 XRD pattern of FeNi@PG.

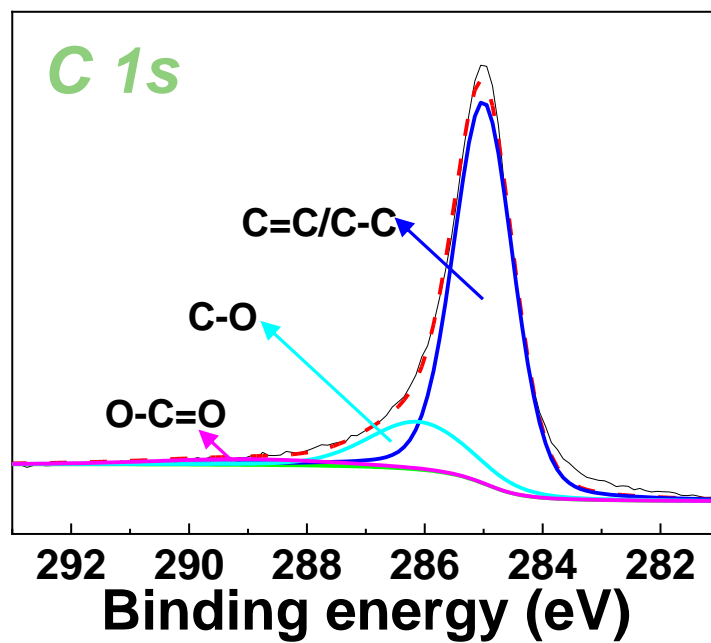

Fig. S3 C1s spectrum of FeNiSe<sub>4</sub>@PG.

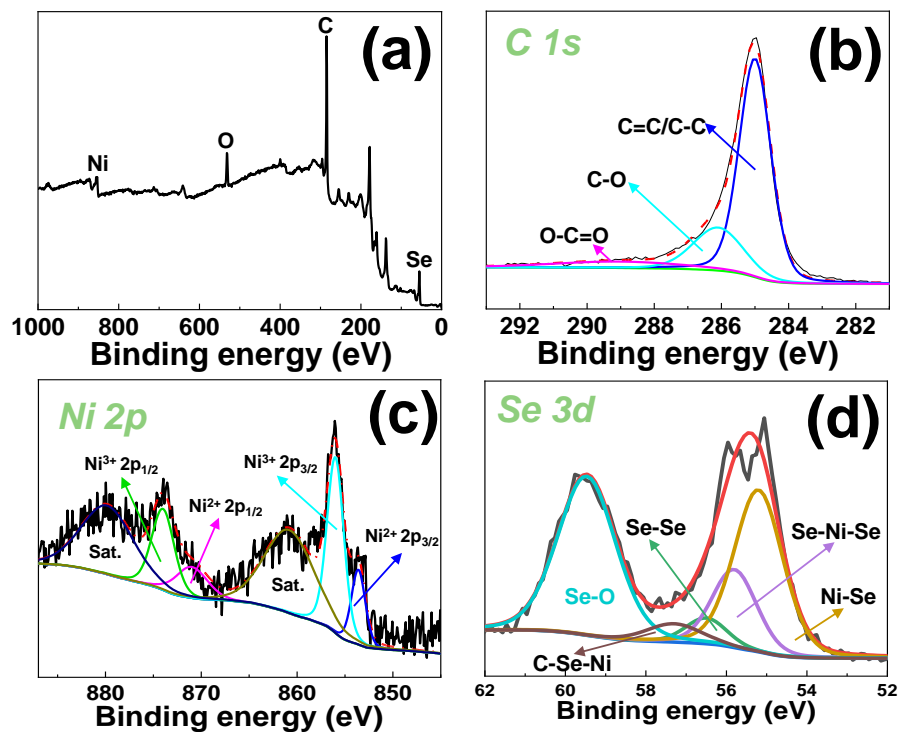

**Fig. S4** (a) XPS spectrum of NiSe<sub>2</sub>/PG and its (b) C 1S, (c) Ni 2p, and (d) Se 3d spectra.

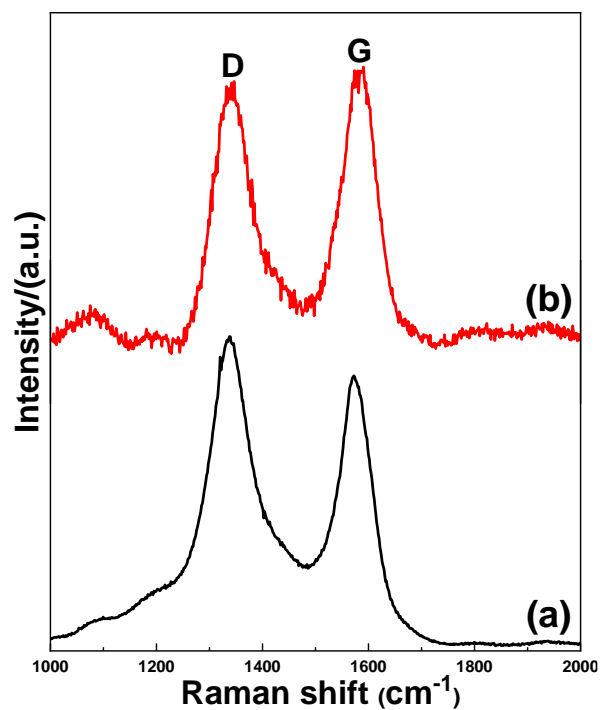

**Fig. S5** Raman spectra of (a) NiSe<sub>2</sub>/PG and (b) FeNiSe<sub>4</sub>@PG.

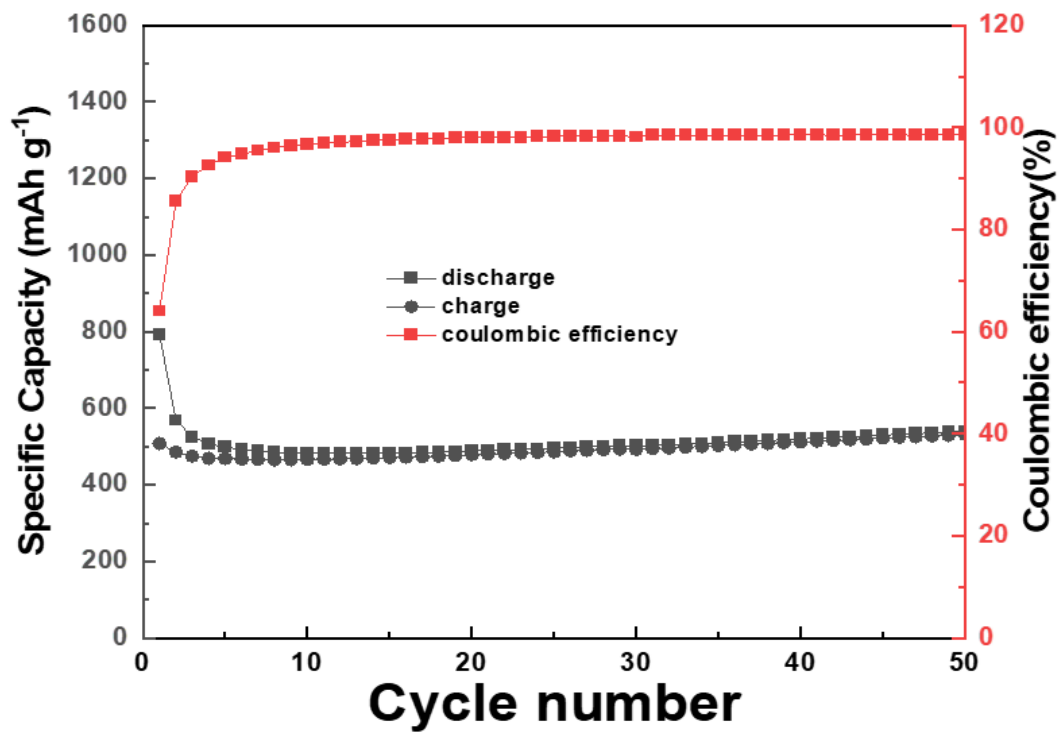

Fig. S6 The cycle performance and coulombic efficiency of FeSe<sub>2</sub>/PG at 100 mA g<sup>-1</sup>.

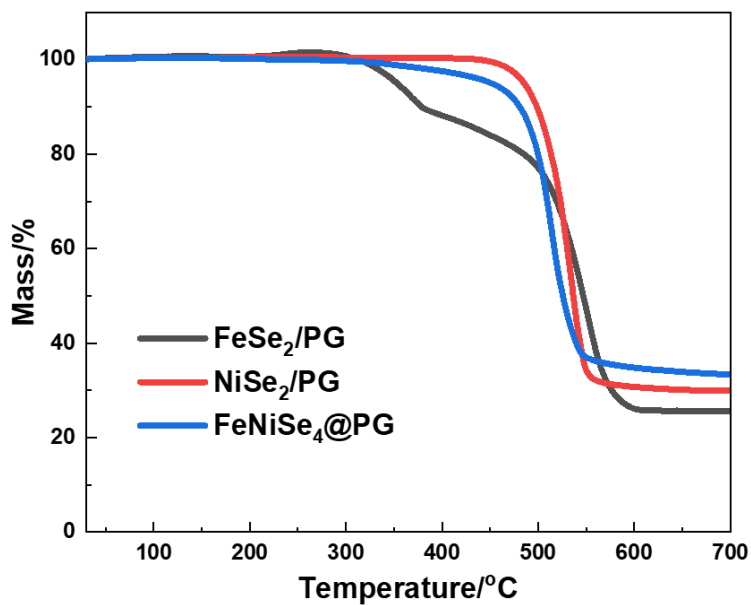

Fig. S7 TG curves of (a) FeNiSe<sub>4</sub>@PG, (b) NiSe<sub>2</sub>/PG, and (c) FeSe<sub>2</sub>/PG.

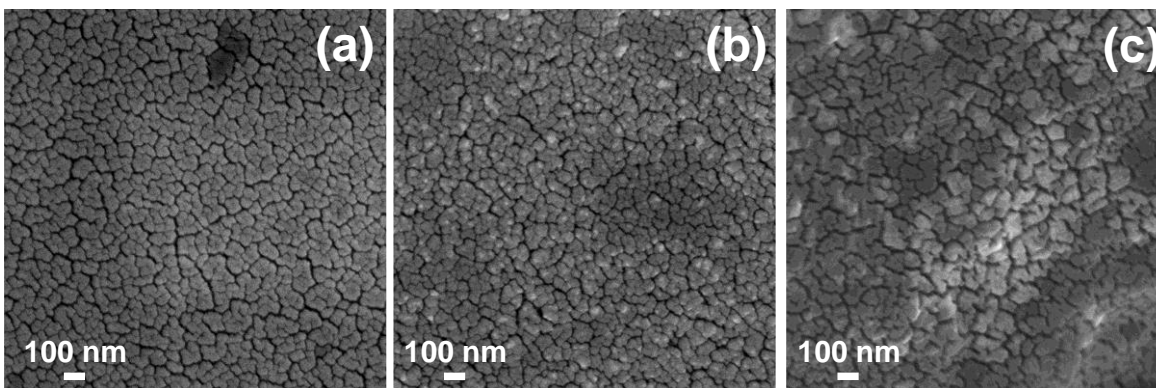

**Fig. S8** SEM images of (a) FeNiSe<sub>4</sub>@PG, (b) NiSe<sub>2</sub>/PG, and (c) FeSe<sub>2</sub>/PG electrodes after cycling at 100 mA g<sup>-1</sup>.

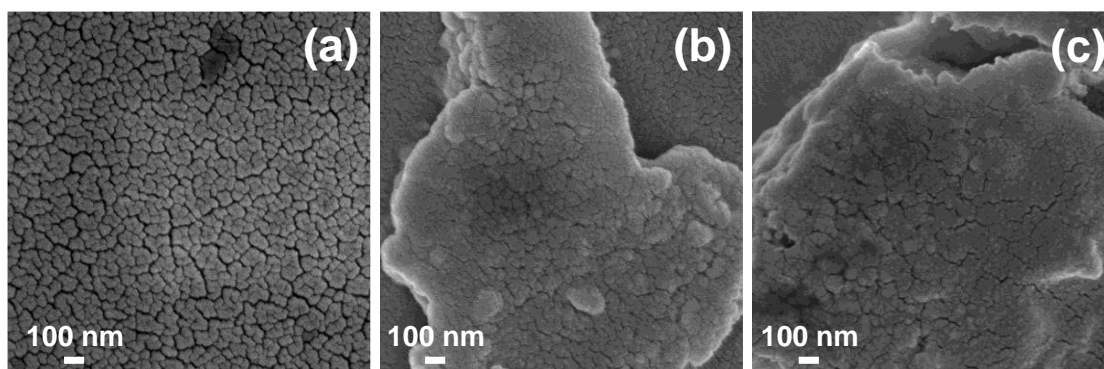

**Fig. S9** SEM images of (a) FeNiSe<sub>4</sub>@PG electrodes after cycling at (a) 100 mA g<sup>-1</sup>, (b) 1 Ag<sup>-1</sup>, and (c) 5 Ag<sup>-1</sup>.

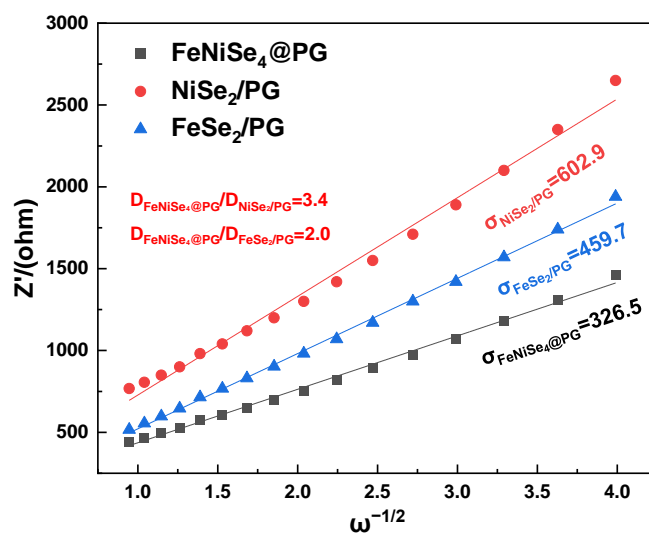

**Fig. S10** Relationship between  $Z'$  and  $\omega^{-1/2}$  for FeNiSe<sub>4</sub>@PG, NiSe<sub>2</sub>/PG, and FeSe<sub>2</sub>/PG.

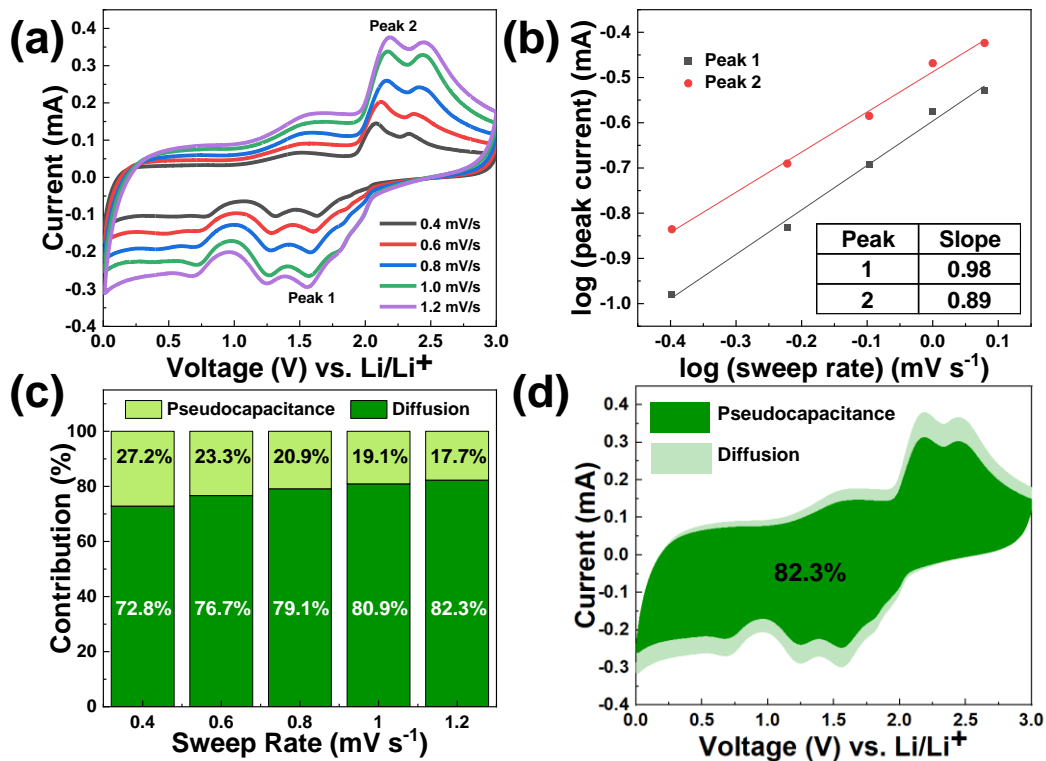

**Fig. S11** (a) CV curves at various sweep rates and (b) corresponding log(peak current)-log(sweep rate) plots for FeNiSe<sub>4</sub>@PG electrode. c) Pseudocapacitive contributions for the FeNiSe<sub>4</sub>@PG electrode at various sweep rates. d) Pseudocapacitive and diffusion-controlled contribution for the FeNiSe<sub>4</sub>@PG electrode at 1.2 mV s<sup>-1</sup>

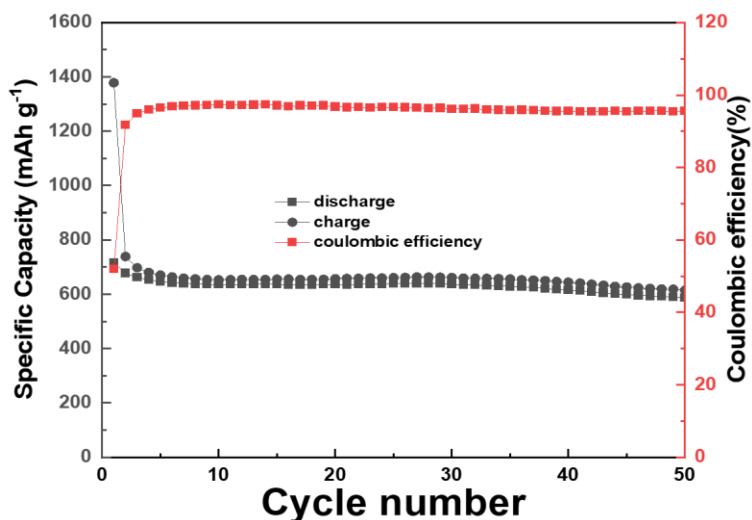

**Table S1** The electrolyte resistance, SEI film resistance, and charge-transfer resistance of NiSe<sub>2</sub>/PG and FeNiSe<sub>4</sub>@PG.

|                                | NiSe <sub>2</sub> /PG | FeNiSe <sub>4</sub> @PG |
|--------------------------------|-----------------------|-------------------------|
| The electrolyte resistance     | 2.266                 | 3.223                   |
| The SEI film resistance        | 19.88                 | 20.01                   |
| The charge-transfer resistance | 107.7                 | 51.1                    |
